# Supplementary material for: Relationship between urine specific gravity and the prevalence rate of kidney stone
Source: PubMed Central journal article supplement — Transl Androl Urol. 2021 Jan;10(1):184–94. doi: 10.21037/tau-20-929 (PMC7844516; doi:10.21037/tau-20-929), 2021-01
Supplement: tau-10-01-184-supplementary.pdf [file tau-10-01-184-supplementary.pdf]

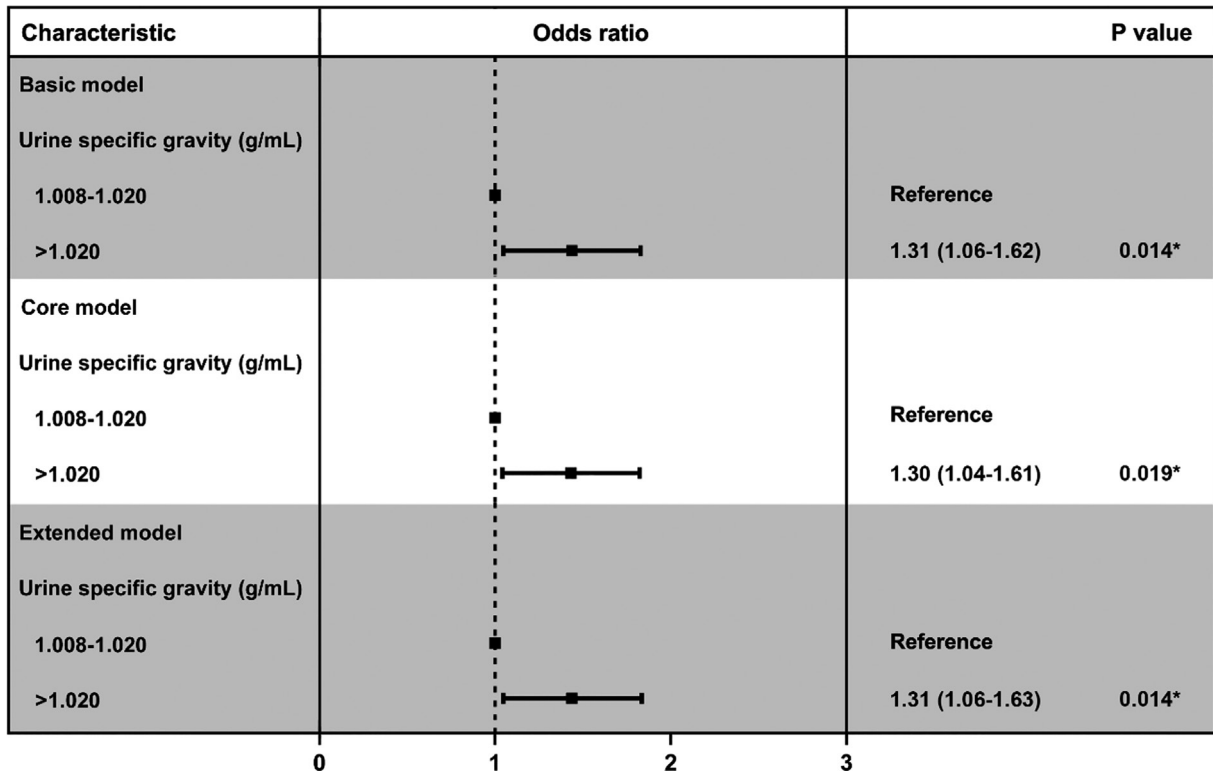

**Figure S1** Adjusted odds ratios for associations between the urine specific gravity and the risk of kidney stone in the two groups (1.008–1.020 and >1.020 group).
